# Supplementary material for: Reconstitution reveals two paths of force transmission through the kinetochore
Source: eLife. 2020 May 14;9:e56582. doi: 10.7554/eLife.56582 (PMC7367685; doi:10.7554/eLife.56582)
Supplement: Figure 2—source data 1. [file elife-56582-fig2-data1.xlsx]

## Sheet: Sheet1
		All proteins are full-length unless otherwise noted
On beads	Ndc80c (Ndc80, Nuf2, Spc24-His, Spc25)	2D-MIND (His-linker-Nsl1, S240D,S250D-Dsn1, Mtw1 Nnf1)	OA (Okp1, Ame1-His)	OA (Okp1, Ame1-His)	OA (Okp1, Ame1-His)
In solution		Ndc80c	MIND, Ndc80c	2D-MIND, Ndc80c	2D-MIND, Ndc80c, Dam1c
Number of beads that bound microtubules	99	73	65	203	85
Number of beads with no hold at 1pN	25	24	22	49	21
Number of beads that hold 1pN	74	49	43	154	64
Median rupture force (pN)	3.41	3.15	3.01	3.91	4.53
0.95LCL (pN)	3.2	2.39	2.66	3.56	4.09
0.95 UCL (pN)	3.96	4.07	3.86	4.33	5.55
n	74	49	58	154	47
All ruptures	4.3672	5.0438	3.3062	2.6141	8.5237
	2.2146	2.0827	1.0849	14.408	8.3101
	4.1957	2.1832	1.4061	5.9273	10.421
	3.0865	1.7838	4.0717	3.7694	15.889
	3.3382	1.7486	2.3666	4.948	2.393
	2.15	3.1515	1.1567	5.789	3.0231
	3.9589	2.0843	1.1066	14.163	8.944
	4.435	3.1877	1.2775	10.835	7.0612
	3.0504	4.615	1.3608	5.7302	10.55
	3.2625	3.2868	2.0155	6.517	15.088
	4.5617	3.4643	1.9269	10.205	6.8697
	2.9623	3.5035	4.0432	2.8987	4.0474
	5.0256	3.5909	2.5815	2.423	3.1462
	2.0774	1.5071	2.5268	4.2259	2.3524
	3.4534	6.2904	2.3807	3.9962	3.135
	2.5045	2.364	2.902	4.4132	4.4215
	4.6048	2.4387	4.0082	3.9115	8.2033
	4.2216	2.8323	3.7522	6.5578	10.48
	2.0225	2.8256	7.7561	6.0326	5.964
	4.4204	1.4844	2.6683	4.8764	8.0108
	3.1318	5.665	10.045	8.849	11.017
	4.8151	2.3884	4.5276	4.5067	7.6537
	4.1289	2.7503	3.4004	8.5544	4.2605
	2.0576	2.0345	6.5238	2.4038	3.3527
	3.2165	2.0216	2.2318	4.4692	3.6073
	4.3226	2.1384	1.2801	1.8596	6.7693
	2.4132	4.3811	2.5355	5.4871	15.178
	4.2429	10.464	6.3084	3.5453	13.406
	3.4436	1.7919	10.015	4.682	14.875
	3.4394	4.4994	3.125	8.2336	15.219
	7.7592	4.9364	2.9665	10.983	16.604
	3.2232	3.6979	3.1547	7.428	13.675
	2.1395	4.1131	1.7352	4.0842	10.982
	3.9777	1.8995	1.921	10.738	14.749
	4.4491	4.2767	2.5908	8.3954	12.582
	2.956	7.9738	6.4695	2.3106	7.0882
	9.0501	2.3427	5.5915	3.2521	15.239
	2.8017	2.2213	3.8575	2.9912	9.944
	3.9362	1.4881	7.8444	8.865	14.811
	3.84	3.5728	5.0443	9.0343	14.354
	4.6567	6.5716	1.1533	3.9236	8.5289
	2.1536	1.8618	5.2531	7.9175	7.1848
	4.1554	5.9951	2.6566	5.3422	7.1617
	4.4619	6.5285	1.8783	9.6548	10.193
	3.4672	7.4675	3.2039	5.2936	7.6347
	6.6266	1.5072	3.047	9.8011	5.9
	5.7028	4.0703	3.8591	4.8121	5.2523
	3.053	6.7245	8.2447	16.176	2.4183
	4.9586	2.9951	4.4817	4.6894	4.9271
	1.5423		1.1289	4.5712	8.8901
	5.2365		3.2797	3.7897	2.986
	3.9526		2.7515	2.9746	3.1982
	2.0545		5.1598	3.3909	5.1513
	1.296		14.678	2.2321	4.4626
	3.2427		2.8229	13.178	6.404
	2.6763		4.8101	5.3623	4.5065
	3.5208		1.3748	1.5172	3.9978
	2.4763		2.8189	2.0306	5.4402
	3.1959			3.5572	10.073
	1.6379			3.5812	8.5413
	2.5236			2.0002	5.4721
	3.0375			3.1671	4.5426
	1.362			2.4855	8.329
	4.1683			3.5622	7.8991
	3.3289			3.7157
	4.6124			3.7656
	2.4179			3.9919
	1.6159			2.5808
	4.0065			2.0319
	3.3722			2.2915
	1.9995			2.5523
	4.1936			3.0294
	3.6328			1.3675
	2.4968			1.2355
				2.4958
				5.4984
				4.1936
				10.032
				4.3621
				4.6092
				4.4951
				3.382
				4.3345
				3.8444
				4.1514
				7.1943
				1.8677
				7.7938
				3.8
				8.0419
				3.5821
				6.6856
				2.7166
				1.8286
				1.5609
				3.7495
				1.5144
				3.9401
				2.9941
				6.4795
				2.9241
				4.7612
				4.877
				2.6137
				2.4658
				8.4159
				3.9692
				3.864
				3.0915
				6.3513
				4.5211
				7.4208
				3.0541
				6.0516
				3.9065
				7.2596
				2.1452
				5.3916
				3.1159
				2.0919
				2.3952
				1.8813
				2.7266
				4.7473
				2.0386
				3.2109
				5.4156
				1.3101
				5.5666
				4.1534
				2.0753
				2.014
				2.2981
				2.7914
				2.3397
				6.0374
				1.664
				2.8016
				1.9612
				4.3208
				3.246
				2.7171
				6.4272
				4.7439
				3.9412
				2.7818
				3.0614
				3.4393
				1.3688
				1.6172
				1.2841
				2.7098
				19.074
