# Supplementary material for: Reconstitution reveals two paths of force transmission through the kinetochore
Source: eLife. 2020 May 14;9:e56582. doi: 10.7554/eLife.56582 (PMC7367685; doi:10.7554/eLife.56582)
Supplement: Figure 2—source data 2. [file elife-56582-fig2-data2.xlsx]

## Sheet: Sheet1
Condition (bolded subcomplex is on bead)	Mif2/2D-MIND/Ndc80c	Mif2/2D-MIND/Ndc80c/Dam1c	OA/2D-MIND/Ndc80c	OA/2D-MIND/Ndc80c/Dam1c	Mif2/OA/2D-MIND/Ndc80c	Ndc80c	OA/Mif2/2D-MIND/Ndc80c	Cse4 NCP/OA/2D-MIND/Ndc80c	Cse4 NCP/Mif2/2D-MIND/Ndc80c	Cse4 NCP/OA/Mif2/2D-MIND/Ndc80c	Cse4 NCP/OA/2D-MIND/Ndc80c/Dam1c	Cse4 NCP/CI/OA/Mif2/2D-MIND/Ndc80c/Dam1c	2D-MIND/Ndc80c	OA/WT-MIND/Ndc80c	Mif2/OA/2D-MIND/Ndc80c/Dam1c	Mif2/deltaN-OA/2D-MIND/Ndc80c	MBP-(1-50)Cse4/OA/2D-MIND/Ndc80c
Mif2/2D-MIND/Ndc80c
Mif2/2D-MIND/Ndc80c/Dam1c	0.6673
OA/2D-MIND/Ndc80c	0.08889
OA/2D-MIND/Ndc80c/Dam1c			5.3e-09
Mif2/OA/2D-MIND/Ndc80c	0.02397
Ndc80c
OA/Mif2/2D-MIND/Ndc80c			0.00894		6.7e-10
Cse4 NCP/OA/2D-MIND/Ndc80c
Cse4 NCP/Mif2/2D-MIND/Ndc80c								0.35461
Cse4 NCP/OA/Mif2/2D-MIND/Ndc80c								0.03293	0.00578
Cse4 NCP/OA/2D-MIND/Ndc80c/Dam1c								0.54544
Cse4 NCP/CI/OA/Mif2/2D-MIND/Ndc80c/Dam1c								0.15367			0.49924
2D-MIND/Ndc80c			0.01258			0.53338
OA/WT-MIND/Ndc80c			0.03073										0.83166
Mif2/OA/2D-MIND/Ndc80c/Dam1c					0.12776
Mif2/deltaN-OA/2D-MIND/Ndc80c	0.00076				2.4e-08
MBP-(1-50)Cse4/OA/2D-MIND/Ndc80c								0.91223
MBP-(1-50)Cse4/OA/Mif2/2D-MIND/Ndc80c								0.52374									0.32662
