# Supplementary material for: Reconstitution reveals two paths of force transmission through the kinetochore
Source: eLife. 2020 May 14;9:e56582. doi: 10.7554/eLife.56582 (PMC7367685; doi:10.7554/eLife.56582)
Supplement: Figure 3—source data 1. [file elife-56582-fig3-data1.xlsx]

## Sheet: Sheet1
		indicates out of range (i.e. no rupture, right-censored datapoint)
		All proteins are full-length unless otherwise noted
On beads	OA (Okp1, Ame1-His)	Mif2-MBP-His	Mif2-MBP-His
In solution	2D-MIND, Ndc80c	2D-MIND, Ndc80c	2D-MIND, Ndc80c, Dam1c
Number of beads that bound microtubules	203	166	70
Number of beads with no hold at 1pN	49	51	23
Number of beads that hold 1pN	154	115	47
Median rupture force (pN)	3.91	4.41	7.64
0.95LCL (pN)	3.56	4.02	6.77
0.95 UCL (pN)	4.33	5.06	8.54
n	154	115	64
All ruptures	2.6141	15.341	12.645
	14.408	15.352	4.0886
	5.9273	6.0099	4.0759
	3.7694	5.5706	4.4073
	4.948	3.6474	6.6678
	5.789	8.1727	5.0717
	14.163	4.2731	4.851
	10.835	15.896	5.8036
	5.7302	5.0624	4.0048
	6.517	4.7276	11.585
	10.205	3.4043	8.5649
	2.8987	3.9505	7.7373
	2.423	3.5885	4.9386
	4.2259	4.771	7.832
	3.9962	8.2647	5.6221
	4.4132	16.914	2.7817
	3.9115	9.6038	4.4322
	6.5578	4.7977	2.4956
	6.0326	4.5008	4.5287
	4.8764	4.1247	6.1923
	8.849	3.7321	7.1632
	4.5067	2.9098	5.748
	8.5544	5.5295	2.2426
	2.4038	7.7568	3.4077
	4.4692	3.2367	4.1358
	1.8596	2.8921	2.8873
	5.4871	5.533	5.1567
	3.5453	5.1343	3.0445
	4.682	3.5862	5.1437
	8.2336	12.465	9.472
	10.983	5.0494	10.528
	7.428	4.2021	3.1004
	4.0842	4.6201	4.4041
	10.738	4.119	3.4708
	8.3954	10.487	5.6849
	2.3106	5.694	3.3795
	3.2521	3.9114	5.5541
	2.9912	5.6125	8.4853
	8.865	3.1844	3.3918
	9.0343	5.4627	4.5744
	3.9236	2.5923	1.7626
	7.9175	4.719	4.2346
	5.3422	5.1784	3.3342
	9.6548	14.862	1.5985
	5.2936	4.19	2.9832
	9.8011	3.8343	5.0529
	4.8121	1.7672	2.374
	16.176	3.0329
	4.6894	2.706
	4.5712	4.2748
	3.7897	1.7668
	2.9746	2.5801
	3.3909	4.5933
	2.2321	3.1572
	13.178	3.912
	5.3623	10.441
	1.5172	5.697
	2.0306	1.3036
	3.5572	3.004
	3.5812	3.4862
	2.0002	4.0912
	3.1671	1.6241
	2.4855	4.5471
	3.5622	3.2827
	3.7157	8.7945
	3.7656	3.1209
	3.9919	2.4858
	2.5808	5.57
	2.0319	3.0504
	2.2915	11.922
	2.5523	5.2893
	3.0294	6.6285
	1.3675	2.0843
	1.2355	1.9953
	2.4958	5.6619
	5.4984	13.761
	4.1936	5.0575
	10.032	4.5989
	4.3621	2.784
	4.6092	5.8632
	4.4951	4.7557
	3.382	9.2984
	4.3345	9.8202
	3.8444	7.3033
	4.1514	10.828
	7.1943	3.1958
	1.8677	8.5859
	7.7938	9.1651
	3.8	5.5587
	8.0419	6.6694
	3.5821	2.2639
	6.6856	6.32
	2.7166	2.2355
	1.8286	3.1018
	1.5609	8.0075
	3.7495	4.4051
	1.5144	1.0811
	3.9401	3.5439
	2.9941	3.1534
	6.4795	3.202
	2.9241	6.7067
	4.7612	4.3004
	4.877	3.7801
	2.6137	3.998
	2.4658	2.5939
	8.4159	2.8106
	3.9692	5.5362
	3.864	1.4562
	3.0915	3.8757
	6.3513	4.0179
	4.5211	5.4969
	7.4208	3.278
	3.0541	1.5555
	6.0516	4.1229
	3.9065	5.6721
	7.2596
	2.1452
	5.3916
	3.1159
	2.0919
	2.3952
	1.8813
	2.7266
	4.7473
	2.0386
	3.2109
	5.4156
	1.3101
	5.5666
	4.1534
	2.0753
	2.014
	2.2981
	2.7914
	2.3397
	6.0374
	1.664
	2.8016
	1.9612
	4.3208
	3.246
	2.7171
	6.4272
	4.7439
	3.9412
	2.7818
	3.0614
	3.4393
	1.3688
	1.6172
	1.2841
	2.7098
	19.074
