# Supplementary material for: Reconstitution reveals two paths of force transmission through the kinetochore
Source: eLife. 2020 May 14;9:e56582. doi: 10.7554/eLife.56582 (PMC7367685; doi:10.7554/eLife.56582)
Supplement: Figure 4—source data 1. [file elife-56582-fig4-data1.xlsx]

## Sheet: Sheet1
	indicates out of range (i.e. no rupture, right-censored datapoint)
	All proteins are full-length unless otherwise noted
On beads	Mif2-MBP-His	Mif2-MBP-His	Mif2-MBP-His	OA (Okp1, Ame1-His)
In solution	OA, 2D-MIND, Ndc80c	OA/2D-MIND/Ndc80c/Dam1c	deltaN-OA, 2D-MIND, Ndc80c	Mif2, 2D-MIND, Ndc80c
Number of beads that bound microtubules	136	52	86	92
Number of beads with no hold at 1pN	19	16	22	22
Number of beads that hold 1pN	117	36	64	70
Median rupture force (pN)	5.43	5.41	3.87	3.24
0.95LCL (pN)	4.66	4.86	3.31	2.87
0.95 UCL (pN)	6.52	6.16	4.24	3.75
n	117	36	64	70
All ruptures	2.9174	6.1635	7.5575	2.4203
	7.446	5.4375	4.4409	6.0613
	8.1483	4.9973	4.9433	4.0061
	3.3855	9.8084	3.0468	8.5017
	6.087	5.4747	7.5008	5.6496
	6.1873	8.3503	4.8558	1.7115
	6.5181	4.1586	3.4047	1.8628
	3.8826	12.244	2.1874	3.6305
	4.2586	5.3778	1.3384	2.4404
	6.5212	6.366	5.8318	3.6611
	6.8349	3.622	3.9571	4.5071
	6.918	7.1385	2.2979	4.4763
	5.4404	4.2383	4.2403	4.5379
	4.0474	7.6948	7.2852	3.7505
	8.4146	7.5563	1.3785	1.841
	8.0257	5.6268	1.5704	2.5518
	8.0087	2.4915	3.2309	6.2752
	5.9958	7.4921	3.1563	3.2034
	3.1921	7.3996	3.5202	2.2637
	11.233	1.948	2.3036	2.8695
	8.512	4.1205	2.6525	2.5355
	17.685	5.518	1.2053	3.3948
	2.0276	5.2212	1.5231	3.2088
	7.822	3.1955	3.2892	2.0515
	4.6117	5.6062	3.9669	3.133
	4.2735	3.5108	1.5908	8.3213
	13.632	4.8559	4.0185	3.2777
	2.6532	4.7532	4.6072	3.7199
	3.395	10.431	3.3535	2.5821
	10.938	3.0183	5.0908	2.0992
	1.5034	5.4325	4.0173	1.1476
	13.133	4.4365	4.1498	2.8688
	7.3601	5.2737	4.5826	2.9132
	4.7358	5.1469	3.0106	9.902
	4.1921		2.6748	6.6365
	7.9166		1.6442	5.7695
	13.371		5.9671	5.1217
	6.6738		4.4993	2.9212
	4.1533		8.3327	2.2255
	9.7955		4.4122	1.4808
	2.8213		2.7778	6.1186
	8.2171		4.0356	3.0549
	5.9062		3.9539	2.3124
	3.813		8.5958	2.2784
	14.919		3.7883	1.4303
	11.487		3.3081	1.5919
	15.792		4.9979	7.2722
	3.3902		3.0796	4.9329
	10.052		2.6982	3.1846
	4.7812		4.2647	2.5946
	14.869		5.0789	5.1826
	6.1842		4.8887	4.6205
	5.4349		3.6585	2.2703
	10.833		2.9561	1.9646
	13.277		6.3795	2.2489
	2.7684		5.6871	2.0614
	3.0266		2.1563	4.5546
	15.669		1.2992	3.2912
	4.096		5.292	4.0728
	3.7897		3.228	6.9279
	5.3587		4.0683	3.3829
	11.181		1.5606	2.224
	3.2546		3.5364	2.252
	10.504		6.7409	6.0963
	14.718			3.9169
	6.2394			3.6213
	1.445			3.3097
	5.1188			5.0921
	6.9536			5.3838
	10.342			2.8084
	4.1268
	2.8127
	5.841
	12.905
	7.0897
	4.657
	8.3521
	5.6444
	10.548
	7.1982
	11.145
	4.711
	2.1902
	4.101
	3.1602
	3.4347
	7.9613
	8.2569
	3.3728
	7.751
	3.4985
	6.1337
	2.4813
	13.859
	10.369
	5.3317
	3.8271
	3.072
	2.4142
	1.9305
	3.0294
	4.9672
	4.5224
	2.152
	3.807
	6.0941
	3.7026
	5.2941
	2.3841
	3.8836
	2.2473
	1.2988
	8.0308
	1.6372
	2.4306
	4.8146
	2.156
