# Supplementary material for: Reconstitution reveals two paths of force transmission through the kinetochore
Source: eLife. 2020 May 14;9:e56582. doi: 10.7554/eLife.56582 (PMC7367685; doi:10.7554/eLife.56582)
Supplement: Figure 5—source data 1. [file elife-56582-fig5-data1.xlsx]

## Sheet: Sheet1
		All proteins are full-length unless otherwise noted
On beads	601 Cse4 NCP	601 Cse4 NCP	601 Cse4 NCP	MBP-(1-50)Cse4	MBP-(1-50)Cse4	601 Cse4 NCP	601 Cse4 NCP
In solution	OA, 2D-MIND, Ndc80c	Mif2, 2D-MIND, Ndc80c	OA, Mif2, 2D-MIND, Ndc80c	OA, 2D-MIND, Ndc80c	OA, Mif2, 2D-MIND, Ndc80c	OA, 2D-MIND, Ndc80c, Dam1c	CI, OA, Mif2, 2D-MIND, Ndc80c, Dam1c
Number of beads that bound microtubules	133	65	102	93	42	45	42
Number of beads with no hold at 1pN	33	37	35	23	8	24	28
Number of beads that hold 1pN	100	28	67	70	34	21	14
Median rupture force (pN)	3.25	3.26	3.5	3.12	3.05	3.5	3.94
0.95LCL (pN)	2.76	2.66	2.8	2.88	2.61	2.8	3.33
0.95 UCL (pN)	3.75	3.84	6.33	4.12	4.05	6.33	5.04
n	100	28	21	70	34	21	28
All ruptures	2.6872	3.6738	7.4699	3.2082	2.5951	6.4159	3.2279
	1.7605	8.0874	5.1277	2.2611	2.7869	4.3002	4.7382
	6.5732	2.6387	2.9305	3.9453	1.5737	6.7005	3.9325
	2.5882	3.4101	6.0319	2.9213	2.5981	6.3263	11.418
	6.4274	3.839	2.2282	1.9928	1.3535	4.442	5.9905
	4.6397	4.2847	5.7932	2.7506	6.0235	2.7977	6.5224
	4.3152	3.5188	8.1559	2.4459	5.5001	3.9797	4.4796
	1.3097	2.7554	3.7864	6.4386	4.4694	2.3857	3.3202
	3.2935	1.6892	4.5495	6.9717	2.3309	3.2093	3.6903
	1.1112	2.8209	3.5822	5.1563	1.2076	1.5155	2.191
	5.5614	7.8777	4.0478	2.4073	1.7593	2.7377	5.1492
	4.2156	4.167	8.2827	1.6743	6.147	3.7008	7.1346
	3.7548	1.5203	2.5439	2.4417	7.2849	3.5045	2.538
	2.9073	4.5591	3.0555	2.9457	3.8297	1.3906	5.3609
	1.934	5.2262	9.9617	2.807	3.2499	3.1778	2.7146
	4.2807	2.4093	3.5513	2.57	3.1085	1.7074	2.7951
	9.7767	1.4104	4.8419	3.3436	2.9463	3.4842	2.5521
	3.6297	2.9112	1.6713	4.2562	5.0294	11.202	4.3172
	3.8582	4.0696	2.4467	5.1816	1.9962	6.4766	2.3289
	2.6884	3.6485	4.2619	4.1224	4.0409	2.4974	9.3832
	3.5282	1.9037	3.8341	5.2355	1.3533	3.9565	3.3323
	1.738	2.0036	4.7653	2.2932	4.8173		3.9544
	3.6286	3.3897	6.0527	3.1071	4.4008		3.7181
	1.7696	3.8049	5.7148	1.1247	4.0479		4.5621
	2.5096	3.1289	1.191	3.1183	2.9001		3.1886
	2.412	2.6639	5.7732	2.6162	2.9889		4.2927
	7.3141	1.5172	7.3568	4.9438	2.6074		5.0383
	7.7937	1.5639	2.6598	5.1469	3.69		3.8912
	13.893		7.9638	4.9631	1.8967
	2.843		3.9748	2.1921	5.1212
	9.9336		1.1481	2.5422	2.3181
	4.4394		2.7156	6.7215	3.6401
	1.3767		7.659	2.1938	6.1885
	2.1891		2.9328	7.5863	2.3125
	3.6144		8.4175	2.8626
	2.8079		7.6718	2.6981
	1.3966		2.8479	4.3095
	4.9903		2.9323	4.2342
	2.3871		5.9247	1.7806
	4.1552		8.7964	5.2922
	1.5232		4.6187	5.2634
	1.6457		1.7944	2.6241
	4.6919		2.9235	3.7014
	3.3117		2.8271	8.5359
	1.955		3.799	2.8735
	1.5997		3.0616	9.1174
	4.6325		3.6292	5.5408
	2.4247		9.327	5.3637
	1.1301		4.0256	1.1828
	4.6211		1.8564	2.2138
	2.1886		2.784	5.9671
	2.9134		2.2948	3.084
	3.5263		3.0852	3.4762
	4.2833		5.4215	3.1098
	7.0022		7.6124	1.5162
	3.4875		4.4949	2.823
	4.83		1.8746	3.782
	2.7197		6.1674	6.3674
	4.2025		4.4846	4.4643
	2.671		4.5072	3.1201
	2.4631		3.6786	2.2384
	4.4002		4.0335	4.1154
	2.3508		4.1657	3.7332
	2.6473		6.0516	2.6395
	6.285		3.6473	6.661
	2.2246		4.0525	3.3598
	2.031		3.0759	6.0347
	1.7723			2.1048
	4.8762			3.0249
	4.0814			2.879
	3.0531
	3.5435
	4.288
	5.8011
	3.7793
	7.3257
	9.5628
	3.2113
	5.6252
	2.0958
	1.6648
	2.7644
	1.7087
	4.1342
	2.5185
	2.1568
	4.4049
	6.1102
	2.0473
	3.0447
	2.1322
	8.2323
	2.6336
	1.5693
	2.3412
	3.8196
	2.9939
	3.3424
	1.7969
	4.2988
